# Supplementary material for: Polycomb CBX7 Directly Controls Trimethylation of Histone H3 at Lysine 9 at the p16 Locus
Source: PubMed Central journal article supplement (PMC2966406; doi:10.1371/journal.pone.0013732), 2010-10-29
Supplement: pone.0013732.s006.pdf [file pone.0013732.s006.pdf]

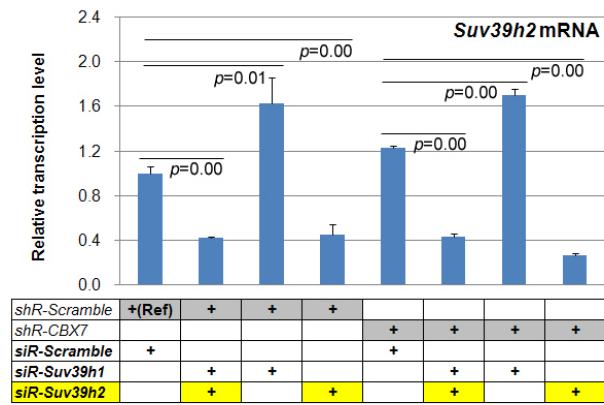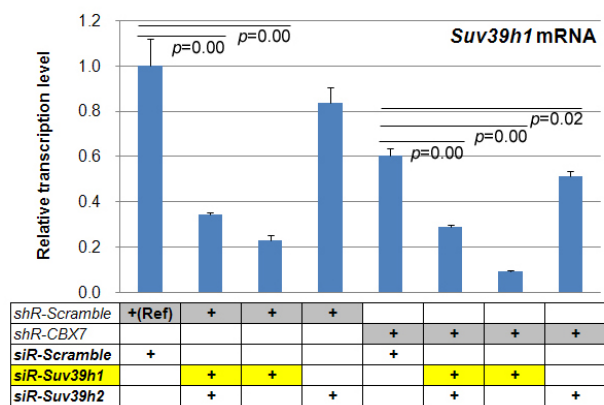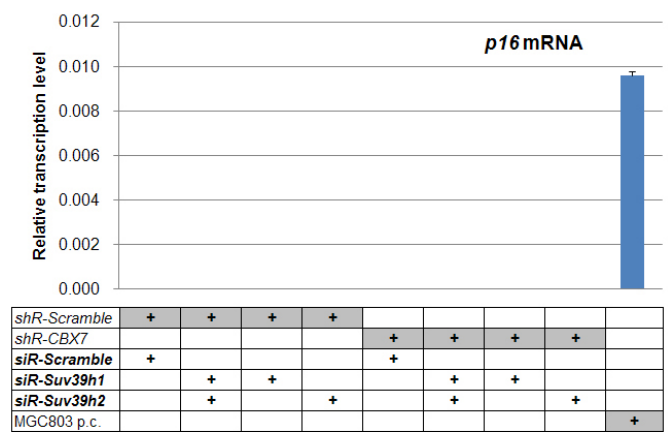

**Supplementary Figure S6. Effect of knockdown of *Suv39h2* and *Suv39h1* by siRNA on transcription of *Suv39h2*, *Suv39h1*, and *p16* in PC3 cell line stably transfected with shRNA against *Cbx7* or scramble shRNA control.** Transcription of *Suv39h2* and *Suv39h1* was knockdown by *siR-Suv39h2* and *Suv39h1*, respectively. Transcription level of *Suv39h2* was significantly increased by *siR-Suv39h1*, whereas transcription of *Suv39h1* was not increased by *siR-Suv39h2*. Transcription of *p16* was not observed in the PC3 cells, in which *p16* is inactivated by methylation of CpG island, after knockdown of *Suv39h2* and/ or *Suv39h1*. The relative transcription levels of *Suv39h2* and *Suv39h1* were adjusted with their transcription value in the control cells transfected with *shR-Scramble*. MGC803 cells with active *p16* were used as a positive control in the quantitative RT-PCR assay for detection of *p16* mRNA. The adjusting could not carried out for *p16* mRNA because it is not transcribed in the *shR-Scramble* control cells.
